# Supplementary material for: Development and evaluation of an ensemble resource linking medications to their indications
Source: PubMed Central journal article supplement — J Am Med Inform Assoc. 2013 Apr 10;20(5):954–61. doi: 10.1136/amiajnl-2012-001431 (PMC3756263; doi:10.1136/amiajnl-2012-001431), 2013-04-10
Supplement: amiajnl-2012-001431-s1.pdf [file amiajnl-2012-001431-s1.pdf]

Supplementary Table

Examples of four commonly-used medications from MEDI, Number in Parentheses indicates how many sources contain the indication

| RXCUI_IN | STR_IN    | MEDI-HPS indications                                                                                                                                                                                                                                                                     | Other MEDI indications                                                                                                                                                                                                                                                                                                                                                                                                                                                                                                                                                                                                                                                                                                                                                                                                                                                                                                                                                 |
|----------|-----------|------------------------------------------------------------------------------------------------------------------------------------------------------------------------------------------------------------------------------------------------------------------------------------------|------------------------------------------------------------------------------------------------------------------------------------------------------------------------------------------------------------------------------------------------------------------------------------------------------------------------------------------------------------------------------------------------------------------------------------------------------------------------------------------------------------------------------------------------------------------------------------------------------------------------------------------------------------------------------------------------------------------------------------------------------------------------------------------------------------------------------------------------------------------------------------------------------------------------------------------------------------------------|
| 6809     | Metformin | 250.00 type II diabetes mellitus or unspecified type; without mention of complication (4)<br>250.1 Diabetes with ketoacidosis (2)<br>250.10 type II diabetes mellitus or unspecified type; not stated as uncontrolled; with ketoacidosis (2)<br>790.6 Other abnormal blood chemistry (2) | 153.9 Malignant neoplasm of colon; unspecified (1)<br>157.9 Malignant neoplasm of pancreas; part unspecified (1)<br>162.9 Malignant neoplasm of bronchus and lung; unspecified (1)<br>174.9 Malignant neoplasm of breast (female); unspecified (1)<br>185 Malignant neoplasm of prostate (1)<br>250 Diabetes mellitus (1)<br>250.01 type I diabetes mellitus; without mention of complication (1)<br>250.9 Diabetes with unspecified complication (1)<br>250.90 Diabetes mellitus type II or unspecified type; with unspecified complication (1)<br>251.2 Hypoglycemia NOS (1)<br>256.4 Polycystic ovaries (1)<br>271.3 Intestinal disaccharidase deficiencies and disaccharide malabsorption (1)<br>276.2 Acidosis (1)<br>278.00 Obesity NOS (1)<br>278.02 Overweight (1)<br>296.99 Other specified episodic mood disorder (1)<br>410.90 Acute myocardial infarction; episode of care unspecified (1)<br>434.91 Cerebral artery occlusion; unspecified; with cerebral |

|      |            |                                                                                                                                                                                                                                                                                |                                                                                                                                                                                                                                                                                                                                                                                                                                                                                                                                                                                                                                                                                                                                                                                                                                                                                                                                                         |
|------|------------|--------------------------------------------------------------------------------------------------------------------------------------------------------------------------------------------------------------------------------------------------------------------------------|---------------------------------------------------------------------------------------------------------------------------------------------------------------------------------------------------------------------------------------------------------------------------------------------------------------------------------------------------------------------------------------------------------------------------------------------------------------------------------------------------------------------------------------------------------------------------------------------------------------------------------------------------------------------------------------------------------------------------------------------------------------------------------------------------------------------------------------------------------------------------------------------------------------------------------------------------------|
|      |            |                                                                                                                                                                                                                                                                                | <p>infarction (1)</p> <p>593.9 Unspecified disorder of kidney and ureter (1)</p> <p>628.0 Infertility; female; associated with anovulation (1)</p> <p>648.80 Abnormal glucose tolerance of mother; complicating pregnancy; childbirth; or the puerperium; unspecified as to episode of care (1)</p> <p>704.1 Hirsutism (1)</p> <p>780.01 Coma (1)</p> <p>780.79 Other malaise and fatigue (1)</p> <p>783.21 Loss of weight (1)</p> <p>783.9 Other symptoms concerning nutrition; metabolism; and development (1)</p> <p>790.22 Impaired glucose tolerance test (oral) (1)</p> <p>790.99 Other nonspecific findings on examination of blood (1)</p> <p>799.9 Other unknown and unspecified cause of morbidity or mortality (1)</p> <p>93.1 Physical therapy exercises (1)</p> <p>995.3 Allergy unspecified not elsewhere classified (1)</p> <p>997.1 Cardiac complications; not elsewhere classified (1)</p> <p>V22.2 Pregnant state; incidental (1)</p> |
| 6918 | Metoprolol | <p>346 Migraine (2)</p> <p>346.9 Migraine; unspecified (2)</p> <p>346.90 Migraine; unspecified; without mention of intractable migraine without mention of status migrainosus (2)</p> <p>401.9 Hypertension NOS (4)</p> <p>410.90 Acute myocardial infarction; unspecified</p> | <p>242.90 Thyrotoxicosis without mention of goiter or other cause; without mention of thyrotoxic crisis or storm (1)</p> <p>253.5 Diabetes insipidus (1)</p> <p>276.69 Other fluid overload (1)</p> <p>276.9 Electrolyte and fluid disorders not elsewhere classified (1)</p> <p>300.00 Anxiety state unspecified (1)</p>                                                                                                                                                                                                                                                                                                                                                                                                                                                                                                                                                                                                                               |

|      |             |                                                                                                                                                                                                                                                                                                                                                                                                                                                                                                                                                                     |                                                                                                                                                                                                                                                                                                                                                                                                                                                                                                                                                                                                                                                                                                                                                                                                                                                |
|------|-------------|---------------------------------------------------------------------------------------------------------------------------------------------------------------------------------------------------------------------------------------------------------------------------------------------------------------------------------------------------------------------------------------------------------------------------------------------------------------------------------------------------------------------------------------------------------------------|------------------------------------------------------------------------------------------------------------------------------------------------------------------------------------------------------------------------------------------------------------------------------------------------------------------------------------------------------------------------------------------------------------------------------------------------------------------------------------------------------------------------------------------------------------------------------------------------------------------------------------------------------------------------------------------------------------------------------------------------------------------------------------------------------------------------------------------------|
|      |             | <p>site; episode of care unspecified (3)</p> <p>413 Angina pectoris (4)</p> <p>413.9 Other and unspecified angina pectoris (4)</p> <p>427.1 Paroxysmal ventricular tachycardia (2)</p> <p>427.31 Atrial fibrillation (1)</p> <p>427.32 Atrial flutter (1)</p> <p>427.41 Ventricular fibrillation (1)</p> <p>427.89 Other specified cardiac dysrhythmias (3)</p> <p>428 Heart failure (3)</p> <p>428.0 Congestive heart failure (CHF) NOS (2)</p> <p>428.9 Heart failure unspecified (3)</p> <p>786.50 Unspecified chest pain (4)</p> <p>997.91 Hypertension (4)</p> | <p>300.23 Social phobia (1)</p> <p>300.9 Unspecified nonpsychotic mental disorder (1)</p> <p>301.9 Personality disorder NOS (1)</p> <p>333.90 Unspecified extrapyramidal disease and abnormal movement disorder (1)</p> <p>410 Acute myocardial infarction (1)</p> <p>410.9 Acute myocardial infarction; unspecified site (1)</p> <p>426.82 Long QT syndrome (1)</p> <p>427.9 Cardiac dysrhythmia NOS (1)</p> <p>429.9 Heart disease NOS (1)</p> <p>458 Hypotension (1)</p> <p>458.9 Hypotension NOS (1)</p> <p>493 Asthma (1)</p> <p>493.9 Asthma; unspecified (1)</p> <p>493.90 Asthma; unspecified type; without mention of status asthmaticus (1)</p> <p>592.0 Calculus of kidney (1)</p> <p>780.2 Syncope and collapse (1)</p> <p>786.5 Chest pain (1)</p> <p>799.9 Other unknown and unspecified cause of morbidity or mortality (1)</p> |
| 8787 | Propranolol | <p>239 Neoplasms of unspecified nature (2)</p> <p>239.7 Neoplasm of unspecified nature of endocrine glands and other parts of nervous system (3)</p> <p>239.9 Neoplasm of unspecified nature; site unspecified (4)</p> <p>242.90 Thyrotoxicosis without mention of goiter or other cause; without mention of thyrotoxic crisis or</p>                                                                                                                                                                                                                               | <p>070.1 Viral hepatitis A without mention of hepatic coma (1)</p> <p>084 Malaria (1)</p> <p>084.2 Quartan malaria (1)</p> <p>084.6 Malaria NOS (1)</p>                                                                                                                                                                                                                                                                                                                                                                                                                                                                                                                                                                                                                                                                                        |

storm (2)

300.01 Panic disorder without agoraphobia (2)

333.1 Essential and other specified forms of tremor (3)

346 Migraine (2)

346.9 Migraine; unspecified (2)

346.90 Migraine; unspecified; without mention of intractable migraine (2)

401.9 Hypertension NOS (4)

410.90 Acute myocardial infarction (4)

413 Angina pectoris (4)

413.9 Other and unspecified angina pectoris (4)

427 Cardiac dysrhythmias (2)

427.1 Paroxysmal ventricular tachycardia (2)

427.41 Ventricular fibrillation (1)

427.89 Other specified cardiac dysrhythmias (3)

427.9 Cardiac dysrhythmia NOS (2)

428.0 Congestive heart failure (CHF) NOS (1)

429.9 Heart disease NOS (2)

781.0 Abnormal involuntary movements (3)

784.0 Headache (2)

785.0 Tachycardia NOS (2)

786.50 Unspecified chest pain (4)

997.91 Hypertension (4)

228.00 Hemangioma NOS (1)

242 Thyrotoxicosis with or without goiter (1)

250.00 type II diabetes mellitus or unspecified type (1)

253.5 Diabetes insipidus (1)

276.69 Other fluid overload (1)

276.9 Electrolyte and fluid disorders not elsewhere classified (1)

279.9 Unspecified disorder of immune mechanism (1)

300.00 Anxiety state unspecified (1)

308.9 Unspecified acute reaction to stress (1)

309.81 Posttraumatic stress disorder (1)

312.39 Other disorders of impulse control (1)

332.0 Paralysis agitans (1)

339.00 Cluster headache syndrome; unspecified (1)

339.02 Chronic cluster headache (1)

346.1 Migraine without aura (1)

346.10 Migraine without aura (1)

414.0 Coronary atherosclerosis (1)

414.00 Coronary atherosclerosis of unspecified type of vessel (1)

425.11 Hypertrophic obstructive cardiomyopathy (1)

427.31 Atrial fibrillation (1)

427.32 Atrial flutter (1)

427.6 Premature beats (1)

427.60 Premature beats NOS (1)

|       |            |                                              |                                                                                                                                                                                                                                                                                                                                                                                                                                                                                                                                                                                                                                                                                                                                                                                                                                                                                                                                                                                                                                                                                                                                                                      |
|-------|------------|----------------------------------------------|----------------------------------------------------------------------------------------------------------------------------------------------------------------------------------------------------------------------------------------------------------------------------------------------------------------------------------------------------------------------------------------------------------------------------------------------------------------------------------------------------------------------------------------------------------------------------------------------------------------------------------------------------------------------------------------------------------------------------------------------------------------------------------------------------------------------------------------------------------------------------------------------------------------------------------------------------------------------------------------------------------------------------------------------------------------------------------------------------------------------------------------------------------------------|
|       |            |                                              | <p>427.69 Other premature beats (1)</p> <p>440 Atherosclerosis (1)</p> <p>456.1 Esophageal varices without mention of bleeding (1)</p> <p>458 Hypotension (1)</p> <p>458.9 Hypotension NOS (1)</p> <p>572.3 Portal hypertension (1)</p> <p>592.0 Calculus of kidney (1)</p> <p>698.8 Other specified pruritic conditions (1)</p> <p>728.2 Muscular wasting and disuse atrophy (1)</p> <p>757.32 Vascular hamartomas (1)</p> <p>780.2 Syncope and collapse (1)</p> <p>781.99 Other symptoms involving nervous and musculoskeletal systems (1)</p> <p>785.1 Palpitations (1)</p> <p>786.5 Chest pain (1)</p> <p>794.7 Nonspecific abnormal results of function study of basal metabolism (1)</p> <p>797 Senility without mention of psychosis (1)</p> <p>799.24 Emotional lability (ADDED) (1)</p> <p>799.9 Other unknown and unspecified cause of morbidity or mortality (1)</p> <p>94.02 Administration of psychologic test (1)</p> <p>94.22 Lithium therapy (1)</p> <p>94.33 BEHAVIOR THERAPY (1)</p> <p>949.0 Burn of unspecified site; unspecified degree (1)</p> <p>959.01 Head injury NOS (1)</p> <p>995.3 Allergy unspecified not elsewhere classified (1)</p> |
| 29046 | Lisinopril | 250.4 Diabetes with renal manifestations (2) | 099.9 Venereal disease NOS (1)                                                                                                                                                                                                                                                                                                                                                                                                                                                                                                                                                                                                                                                                                                                                                                                                                                                                                                                                                                                                                                                                                                                                       |

401.9 Hypertension NOS (3)  
410.90 Acute myocardial infarction (2)  
428 Heart failure (2)  
428.0 Congestive heart failure (CHF) NOS (3)  
428.9 Heart failure unspecified (2)  
429.3 Cardiomegaly (1)  
997.91 Hypertension (3)

288.09 Other neutropenia (1)  
288.8 Other specified disease of white blood cells (1)  
298.8 Other and unspecified reactive psychosis (1)  
300.9 Unspecified nonpsychotic mental disorder (1)  
401 Essential hypertension (1)  
403.9 Hypertensive renal disease; unspecified (1)  
403.90 Hypertensive renal disease (1)  
405.91 Unspecified renovascular hypertension (1)  
410 Acute myocardial infarction (1)  
410.9 Acute myocardial infarction; unspecified site (1)  
458 Hypotension (1)  
458.9 Hypotension NOS (1)  
459.9 Unspecified circulatory system disorder (1)  
586 Renal failure unspecified (1)  
593.81 Vascular disorders of kidney (1)  
593.9 Unspecified disorder of kidney and ureter (1)  
625.4 Premenstrual tension syndromes (1)  
797 Senility without mention of psychosis (1)  
995.1 Angioneurotic edema not elsewhere classified (1)  
999.9 Other and unspecified complications of medical care (1)  
V60.2 Inadequate material resources (1)
